# Supplementary material for: H2SO4-silica: an eco-friendly heterogeneous catalyst for the differential protection of myo-inositol hydroxyl groups
Source: Royal Society of Chemistry journal article supplement (doi:10.1039/c3ra40506k), 2013-01-01

## Supplementary Information

# **H<sub>2</sub>SO<sub>4</sub>-Silica: An eco-friendly heterogeneous catalyst for the differential protection of *myo*-inositol hydroxyl groups**

Amol M. Vibhute and Kana M. Sureshan\*

*School of Chemistry*

*Indian Institute of Science Education and Research, Thiruvananthapuram,*

*CET Campus, Thiruvananthapuram-16, Kerala, INDIA.*

[kms@iisertvm.ac.in](mailto:kms@iisertvm.ac.in)

### **Index**

|                                                                    |     |
|--------------------------------------------------------------------|-----|
| 1. <sup>1</sup> H NMR of <b>8</b> in DMSO-d <sub>6</sub>           | S2  |
| 2. <sup>1</sup> H NMR of <b>8</b> in DMSO-d <sub>6</sub> (zoom)    | S3  |
| 3. COSY of <b>8</b> in DMSO-d <sub>6</sub>                         | S4  |
| 4. <sup>13</sup> C NMR of <b>8</b> in DMSO-d <sub>6</sub>          | S5  |
| 5. DEPT of <b>8</b> in DMSO-d <sub>6</sub>                         | S6  |
| 6. <sup>1</sup> H NMR of <b>15</b> in DMSO-d <sub>6</sub>          | S7  |
| 7. <sup>1</sup> H NMR of <b>15</b> in DMSO-d <sub>6</sub> (zoom)   | S8  |
| 8. COSY of <b>15</b> in DMSO-d <sub>6</sub>                        | S9  |
| 9. <sup>13</sup> C NMR of <b>15</b> in DMSO-d <sub>6</sub>         | S10 |
| 10. <sup>13</sup> C NMR of <b>15</b> in DMSO-d <sub>6</sub> (zoom) | S11 |
| 11. <sup>13</sup> C NMR of <b>15</b> in DMSO-d <sub>6</sub> (zoom) | S8  |
| 12. DEPT of <b>15</b> in DMSO-d <sub>6</sub>                       | S13 |
| 13. HMBC of <b>15</b> in DMSO-d <sub>6</sub>                       | S14 |
| 14. HMBC of <b>15</b> in DMSO-d <sub>6</sub> (zoom)                | S15 |
| 15. HMBC of <b>15</b> in DMSO-d <sub>6</sub> (zoom)                | S16 |
| 16. HMQC of <b>15</b> in DMSO-d <sub>6</sub>                       | S17 |
| 17. HMQC of <b>15</b> in DMSO-d <sub>6</sub> (zoom)                | S18 |

# Supplementary Information

## <sup>1</sup>H NMR of 8 in DMSO-d<sub>6</sub>

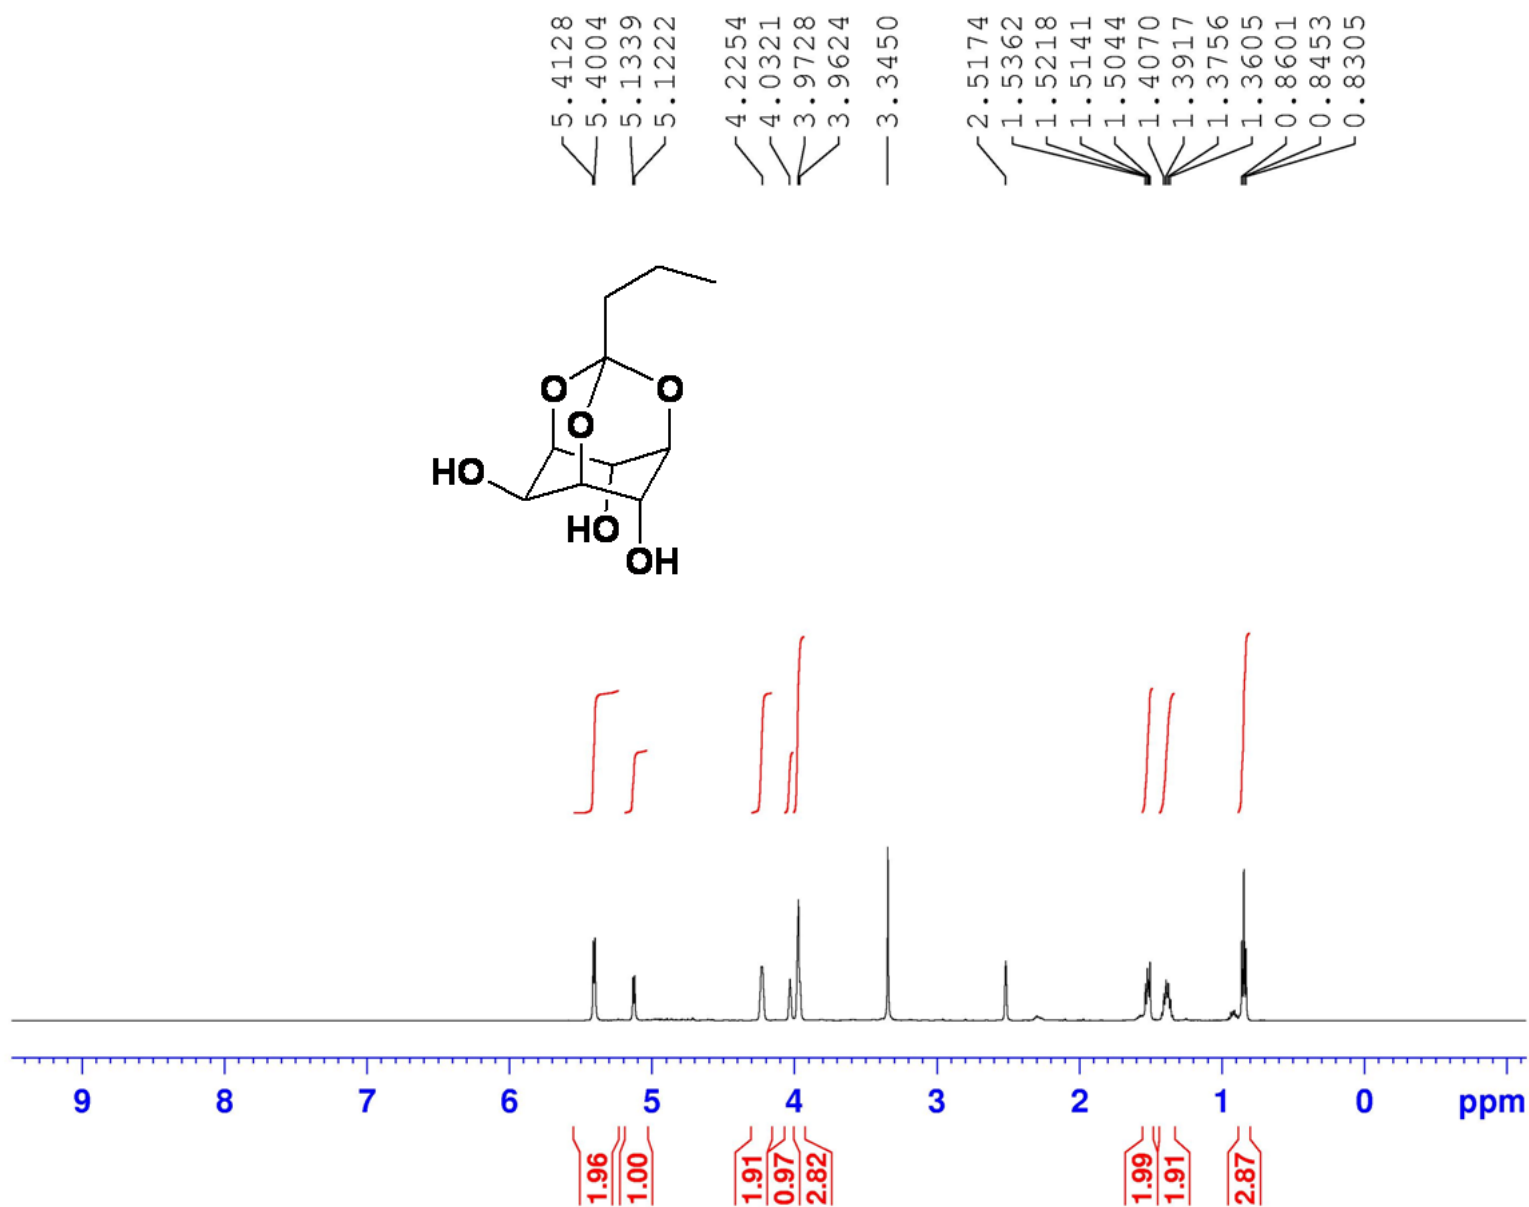

## Supplementary Information

### <sup>1</sup>H NMR of 8 in DMSO-d<sub>6</sub> (zoom)

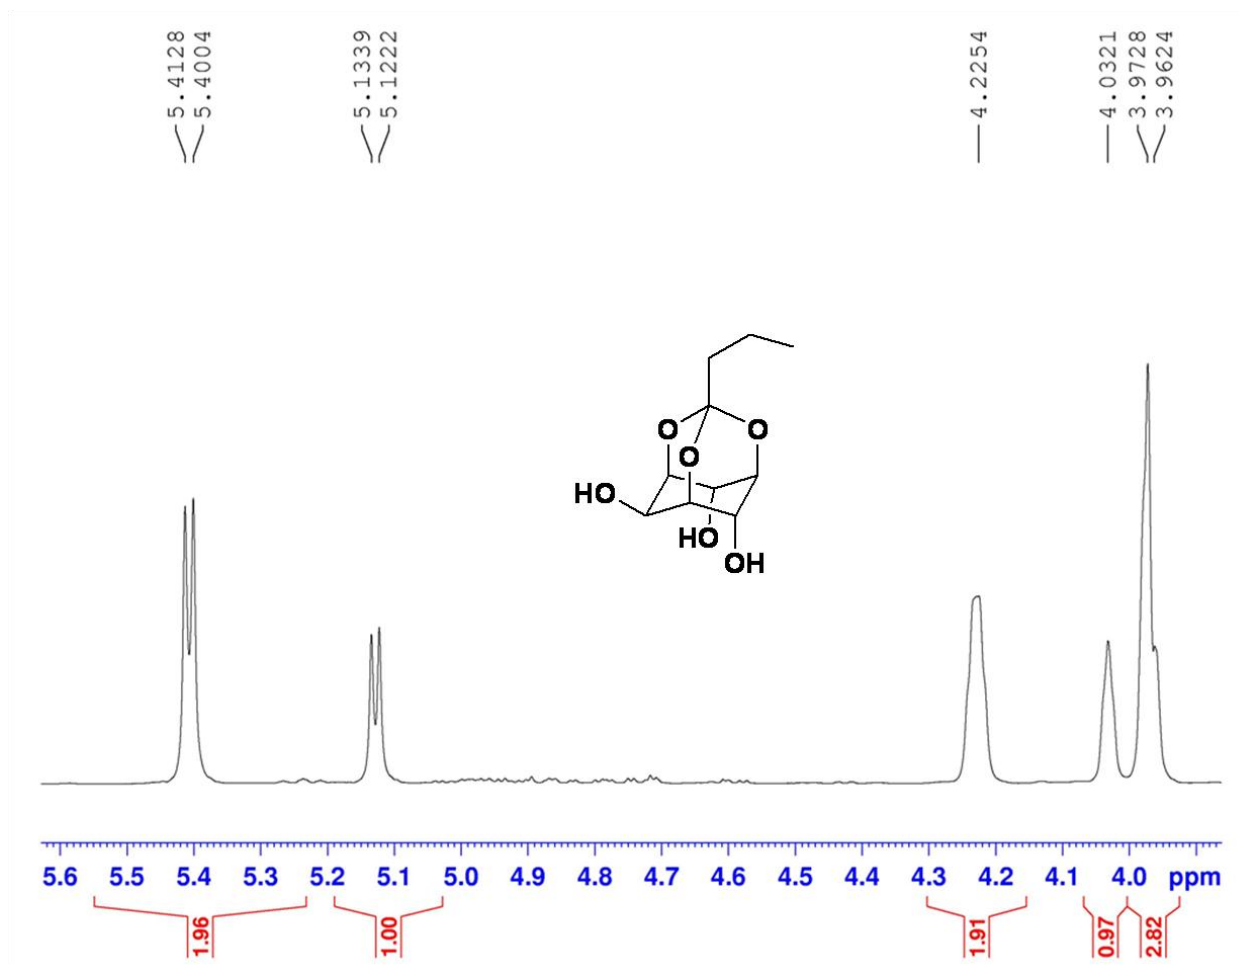

# Supplementary Information

## COSY of 8 in DMSO-d<sub>6</sub>

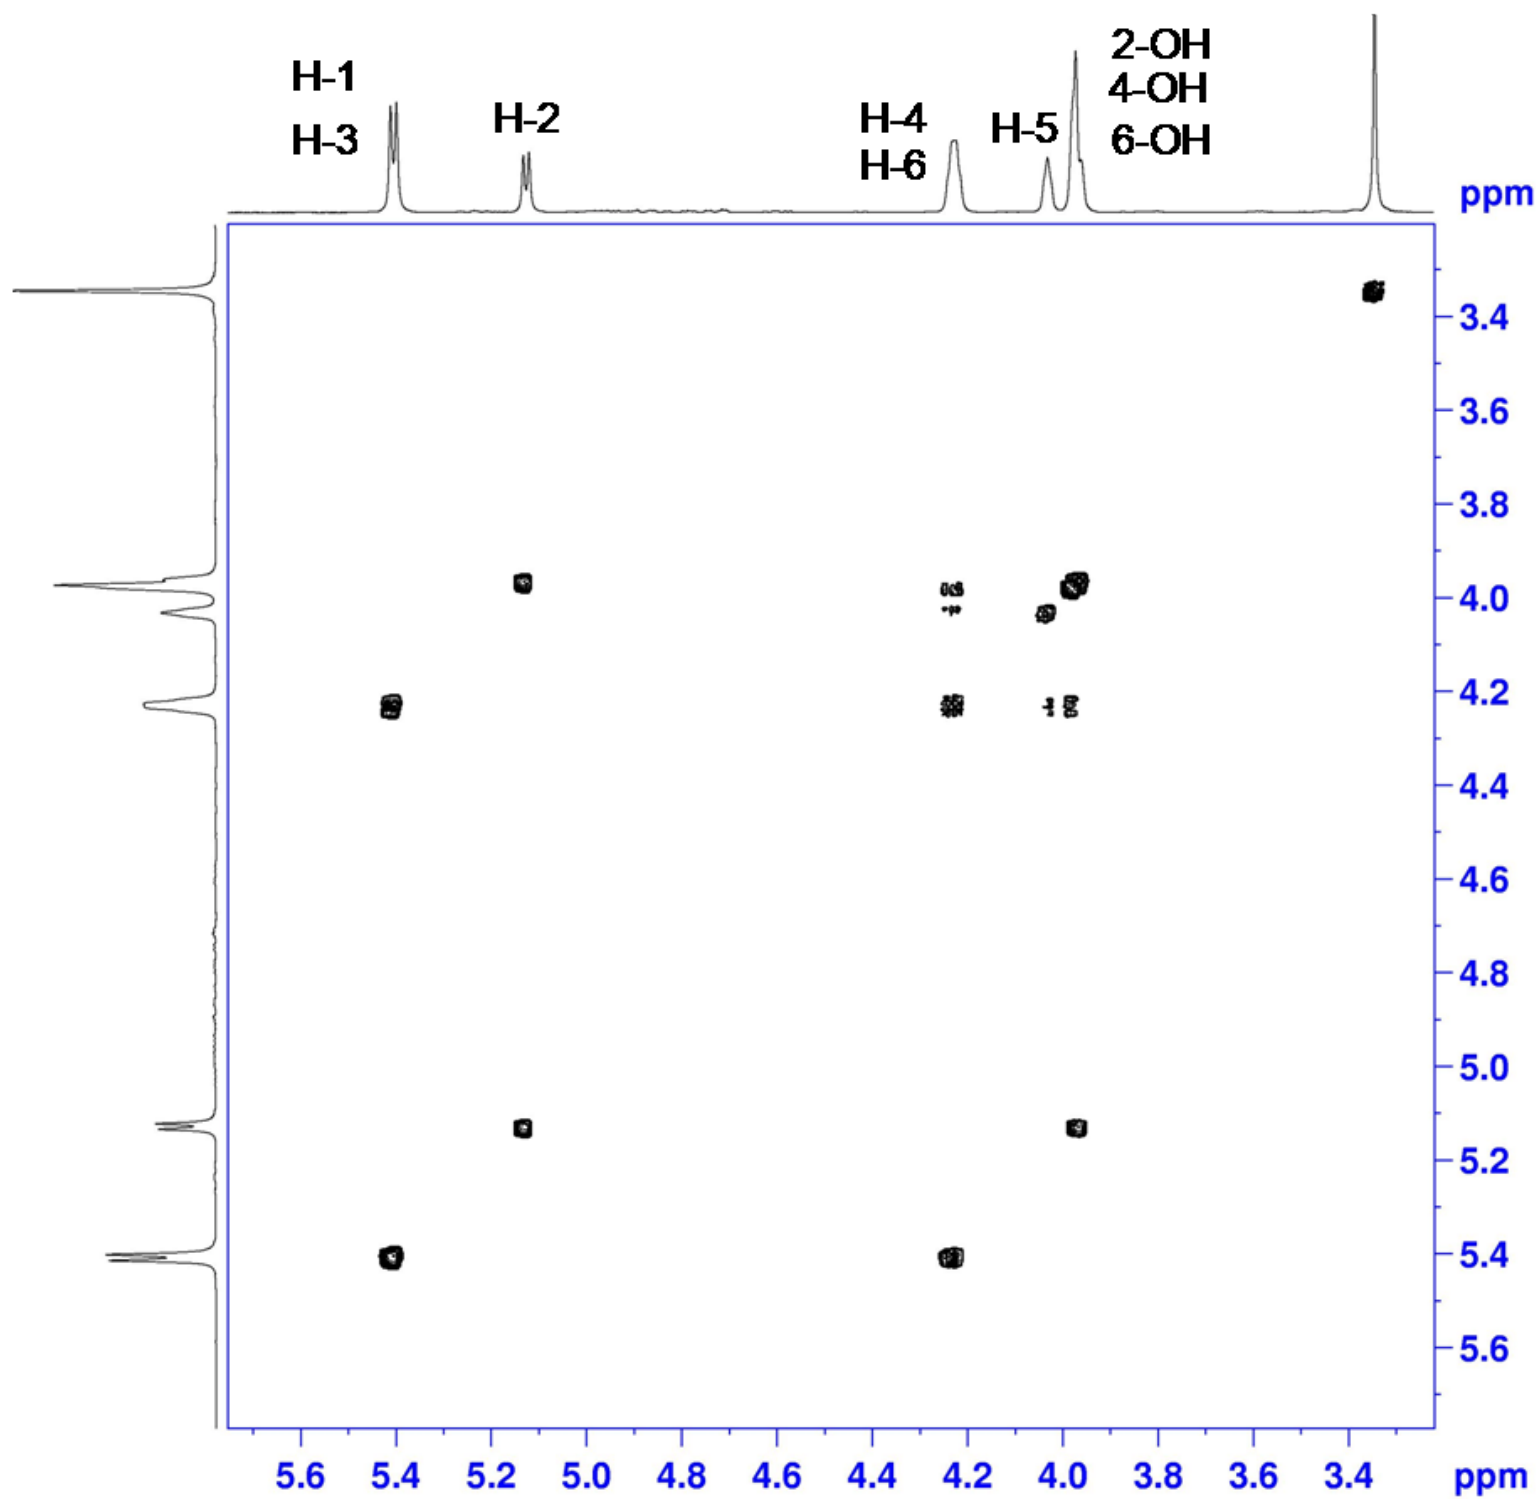

# Supplementary Information

## <sup>13</sup>C NMR of 8 in DMSO-d<sub>6</sub>

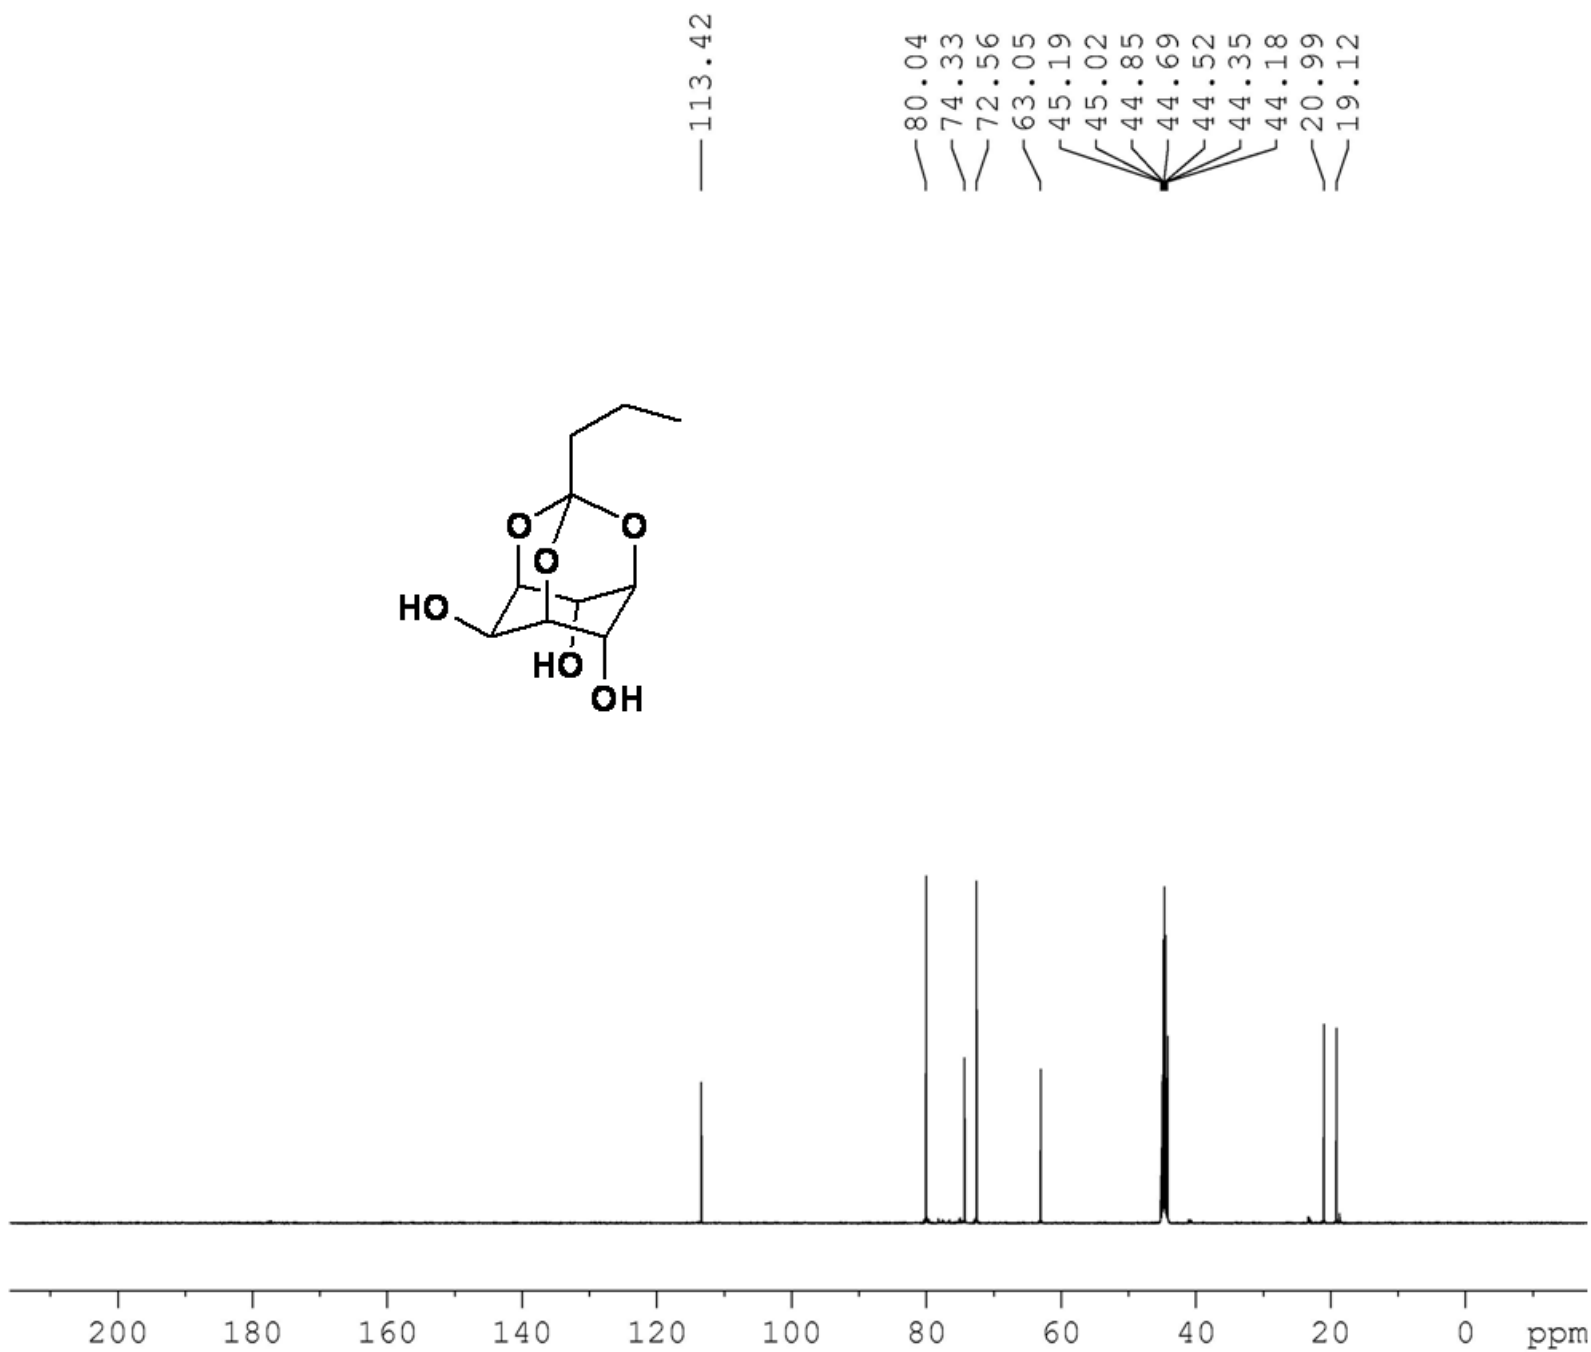

## Supplementary Information

### DEPT of 8 in DMSO-d<sub>6</sub>

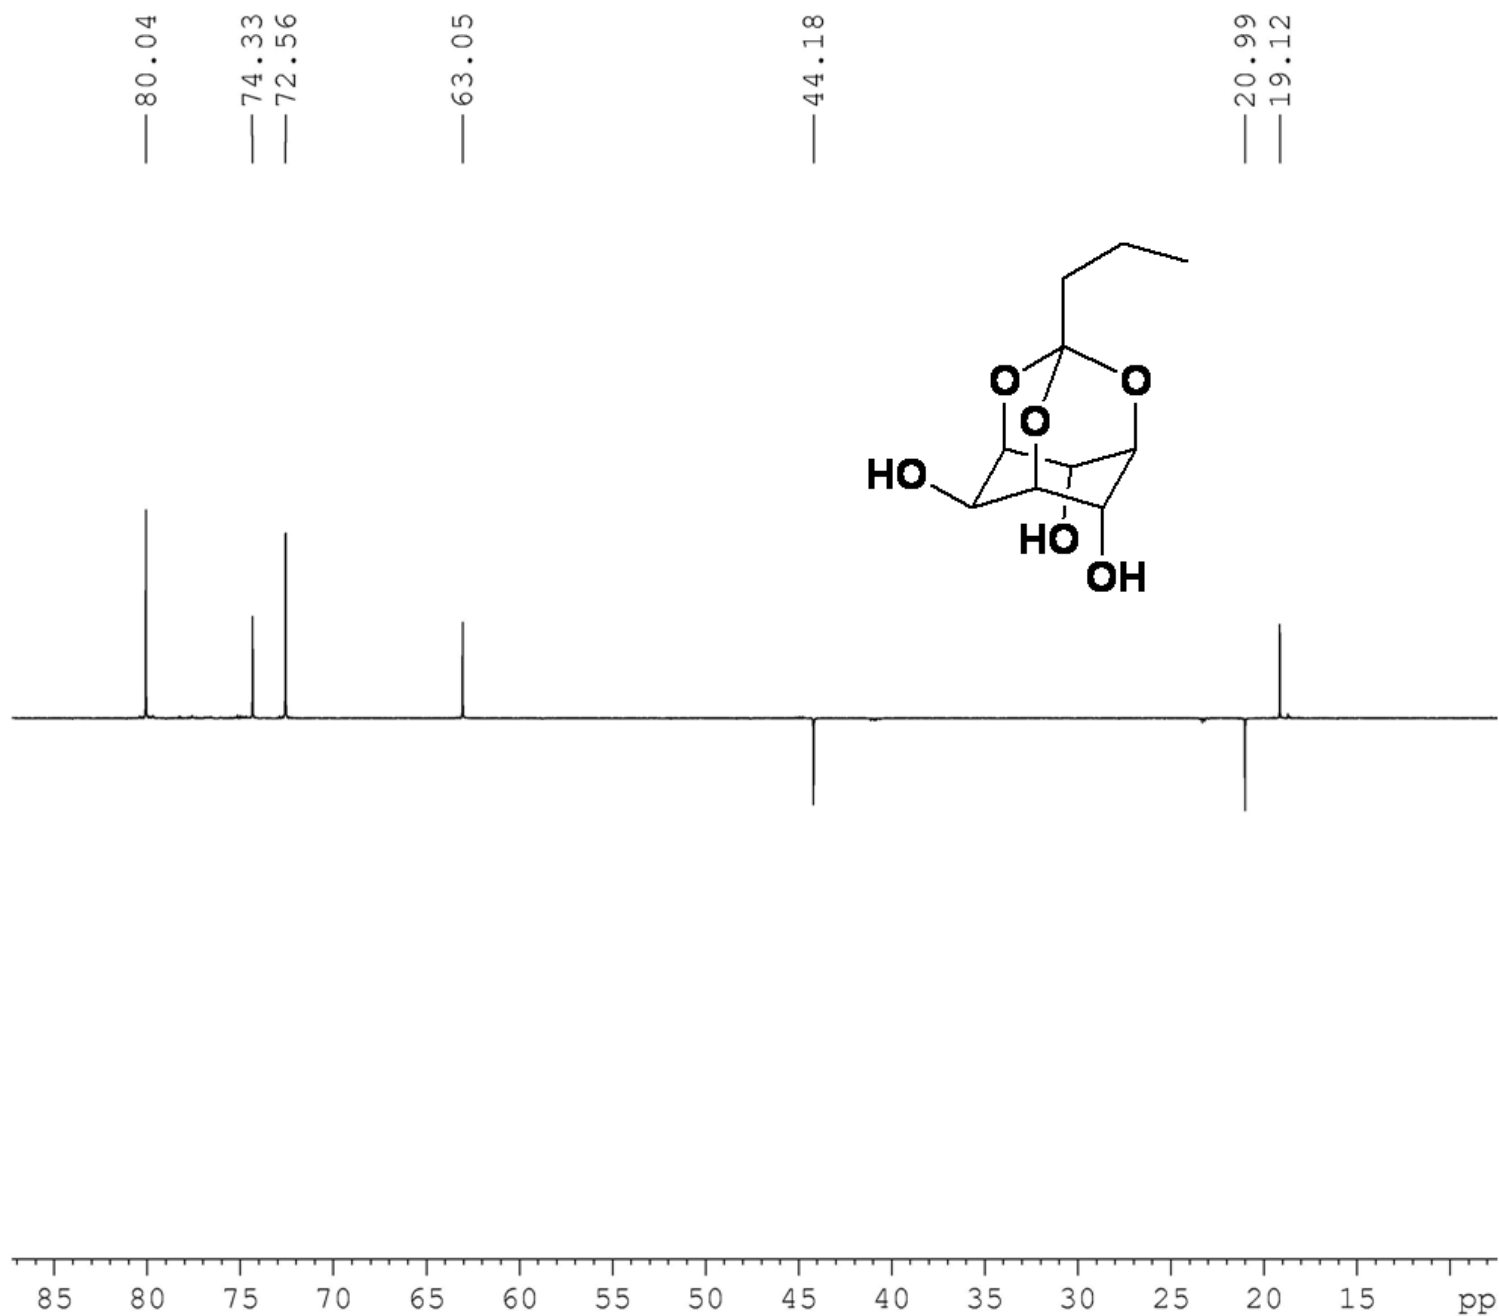

# Supplementary Information

## <sup>1</sup>H NMR of 15 in DMSO-d<sub>6</sub>

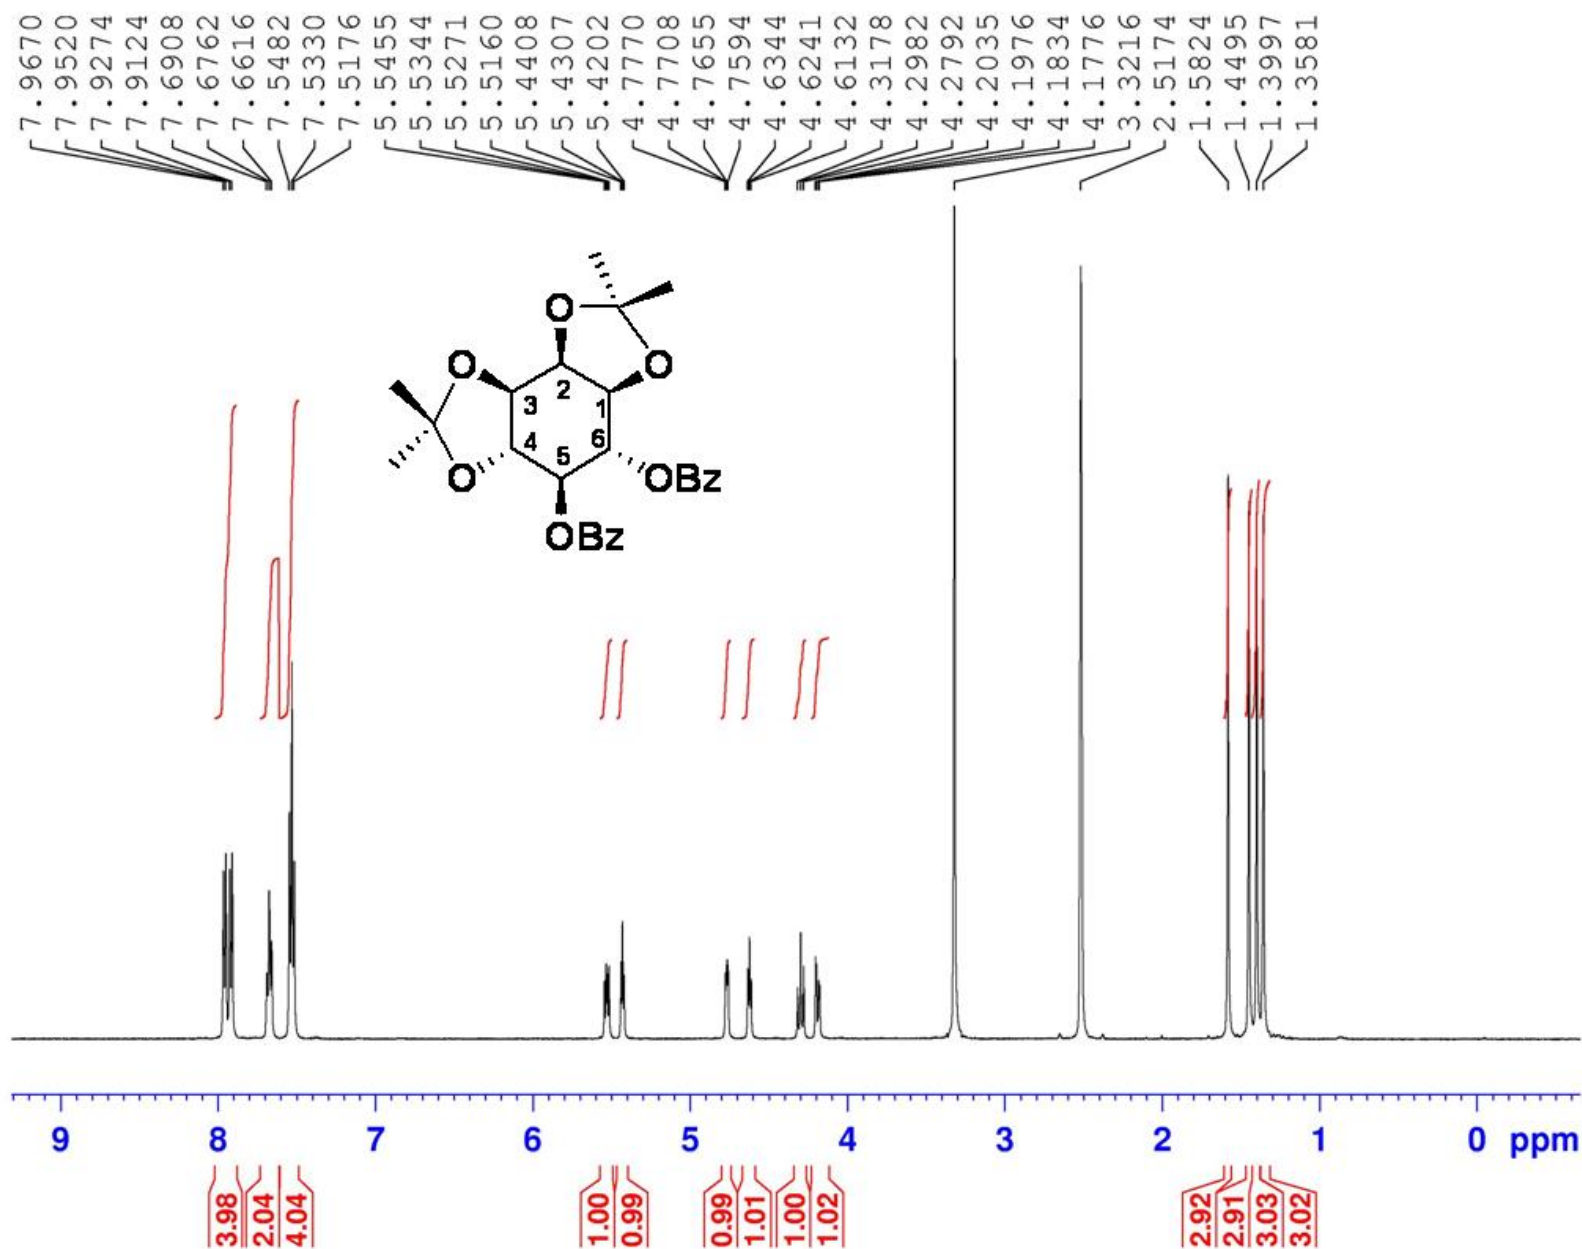

# Supplementary Information

## <sup>1</sup>H NMR of 15 in DMSO-d<sub>6</sub> (zoom)

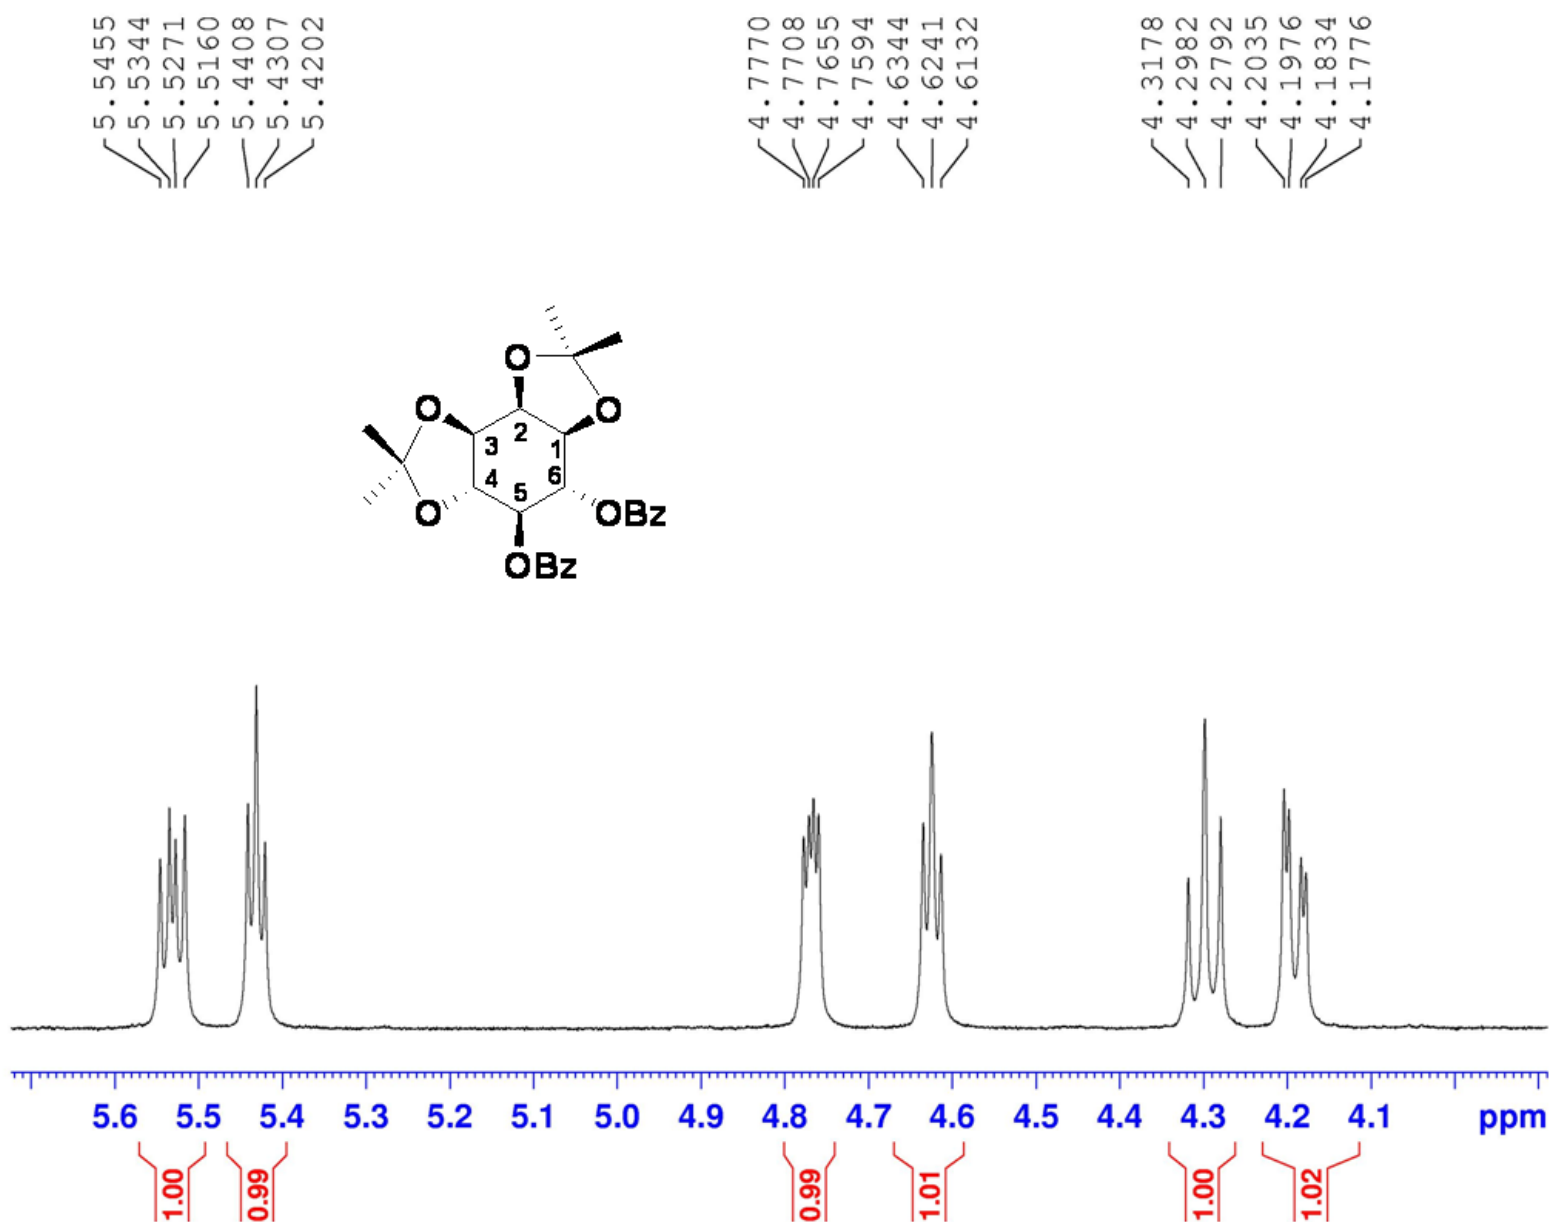



# Supplementary Information

## COSY of 15 in DMSO-d<sub>6</sub>

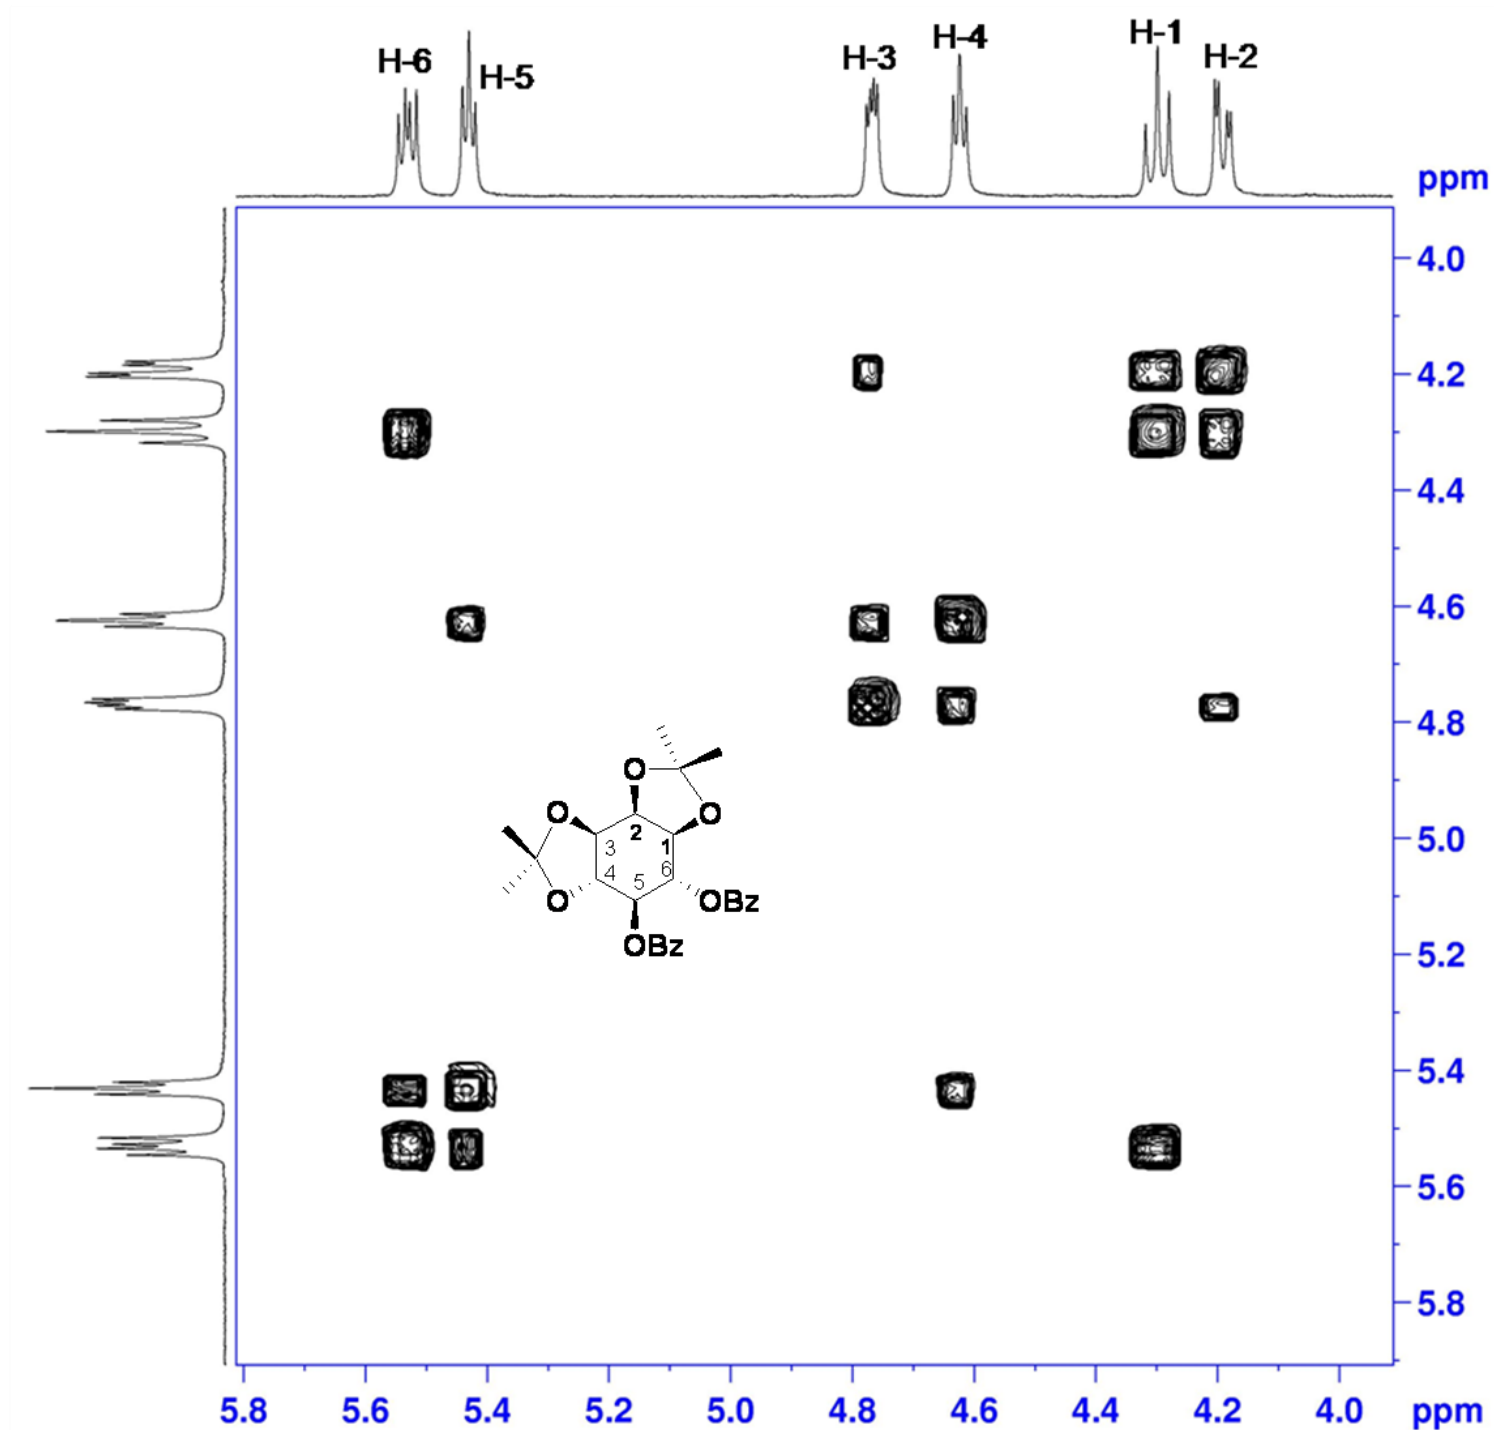

# Supplementary Information

## <sup>13</sup>C NMR of 15 in DMSO-d<sub>6</sub>

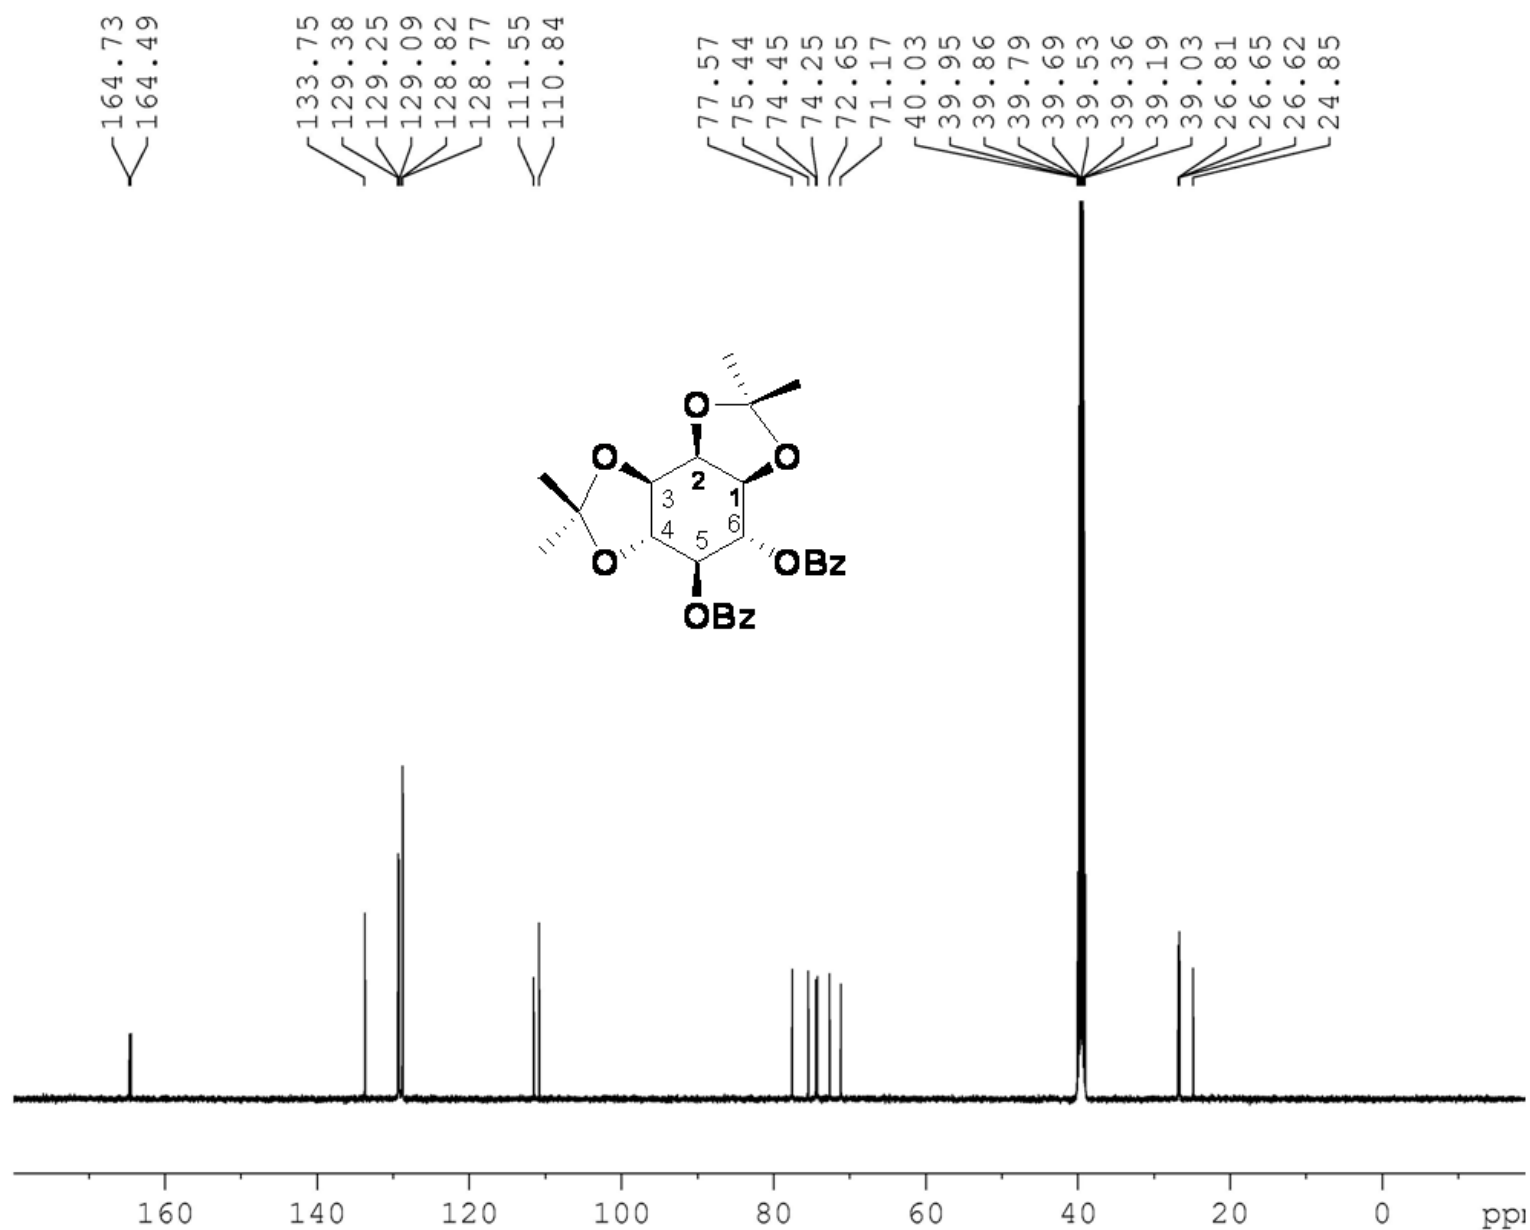

# Supplementary Information

## <sup>13</sup>C NMR of 15 in DMSO-d<sub>6</sub> (zoom)

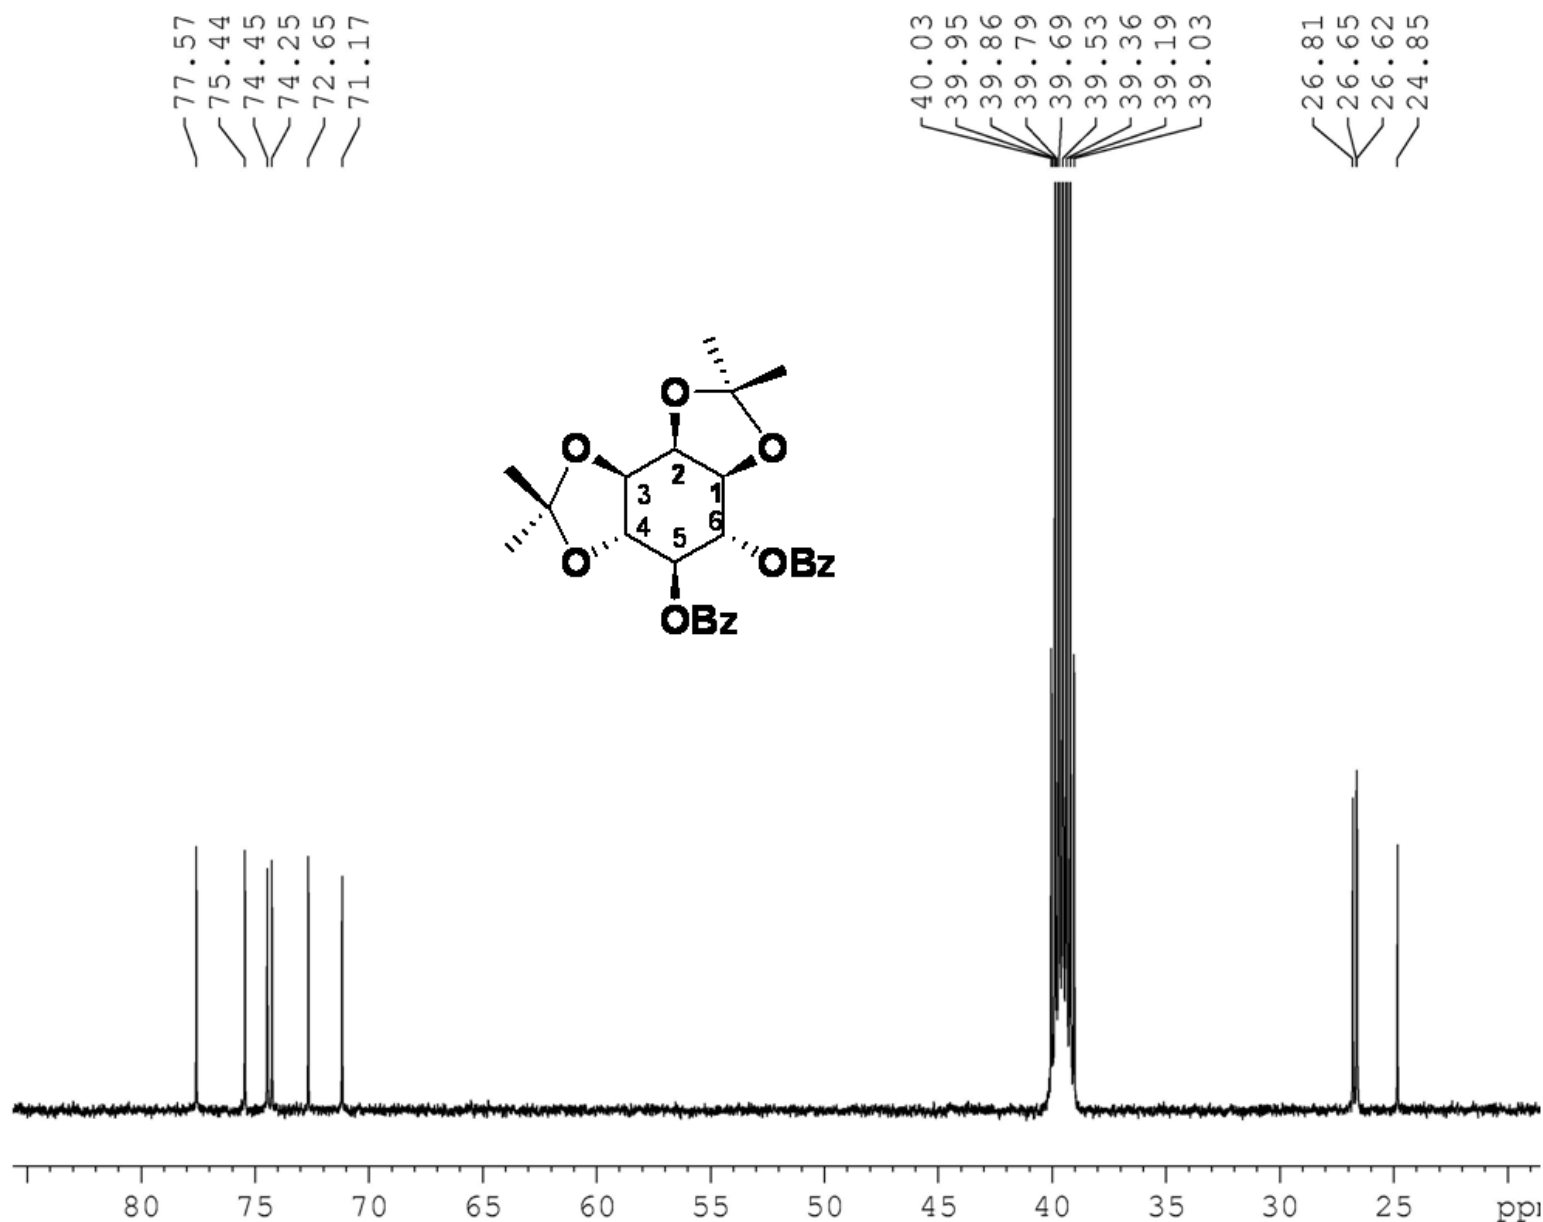

# Supplementary Information

## <sup>13</sup>C NMR of 15 in DMSO-d<sub>6</sub> (zoom)

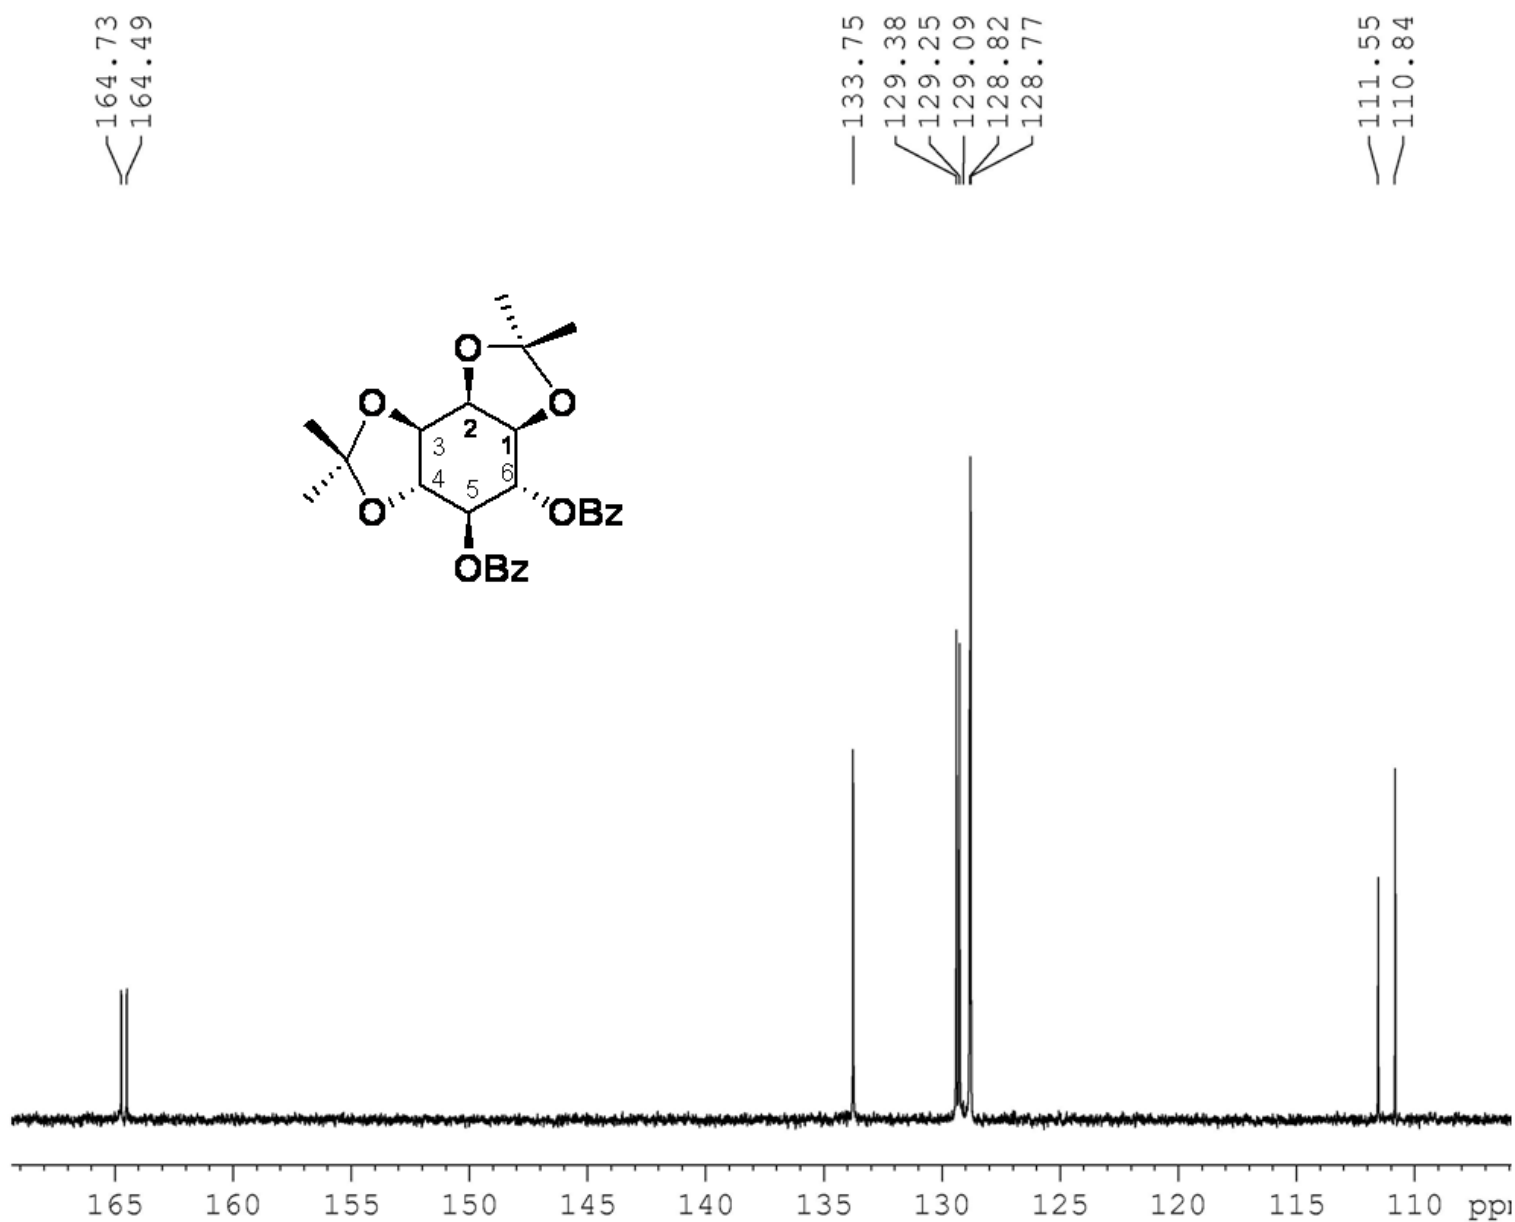

# Supplementary Information

## DEPT of 15 in DMSO-d<sub>6</sub>

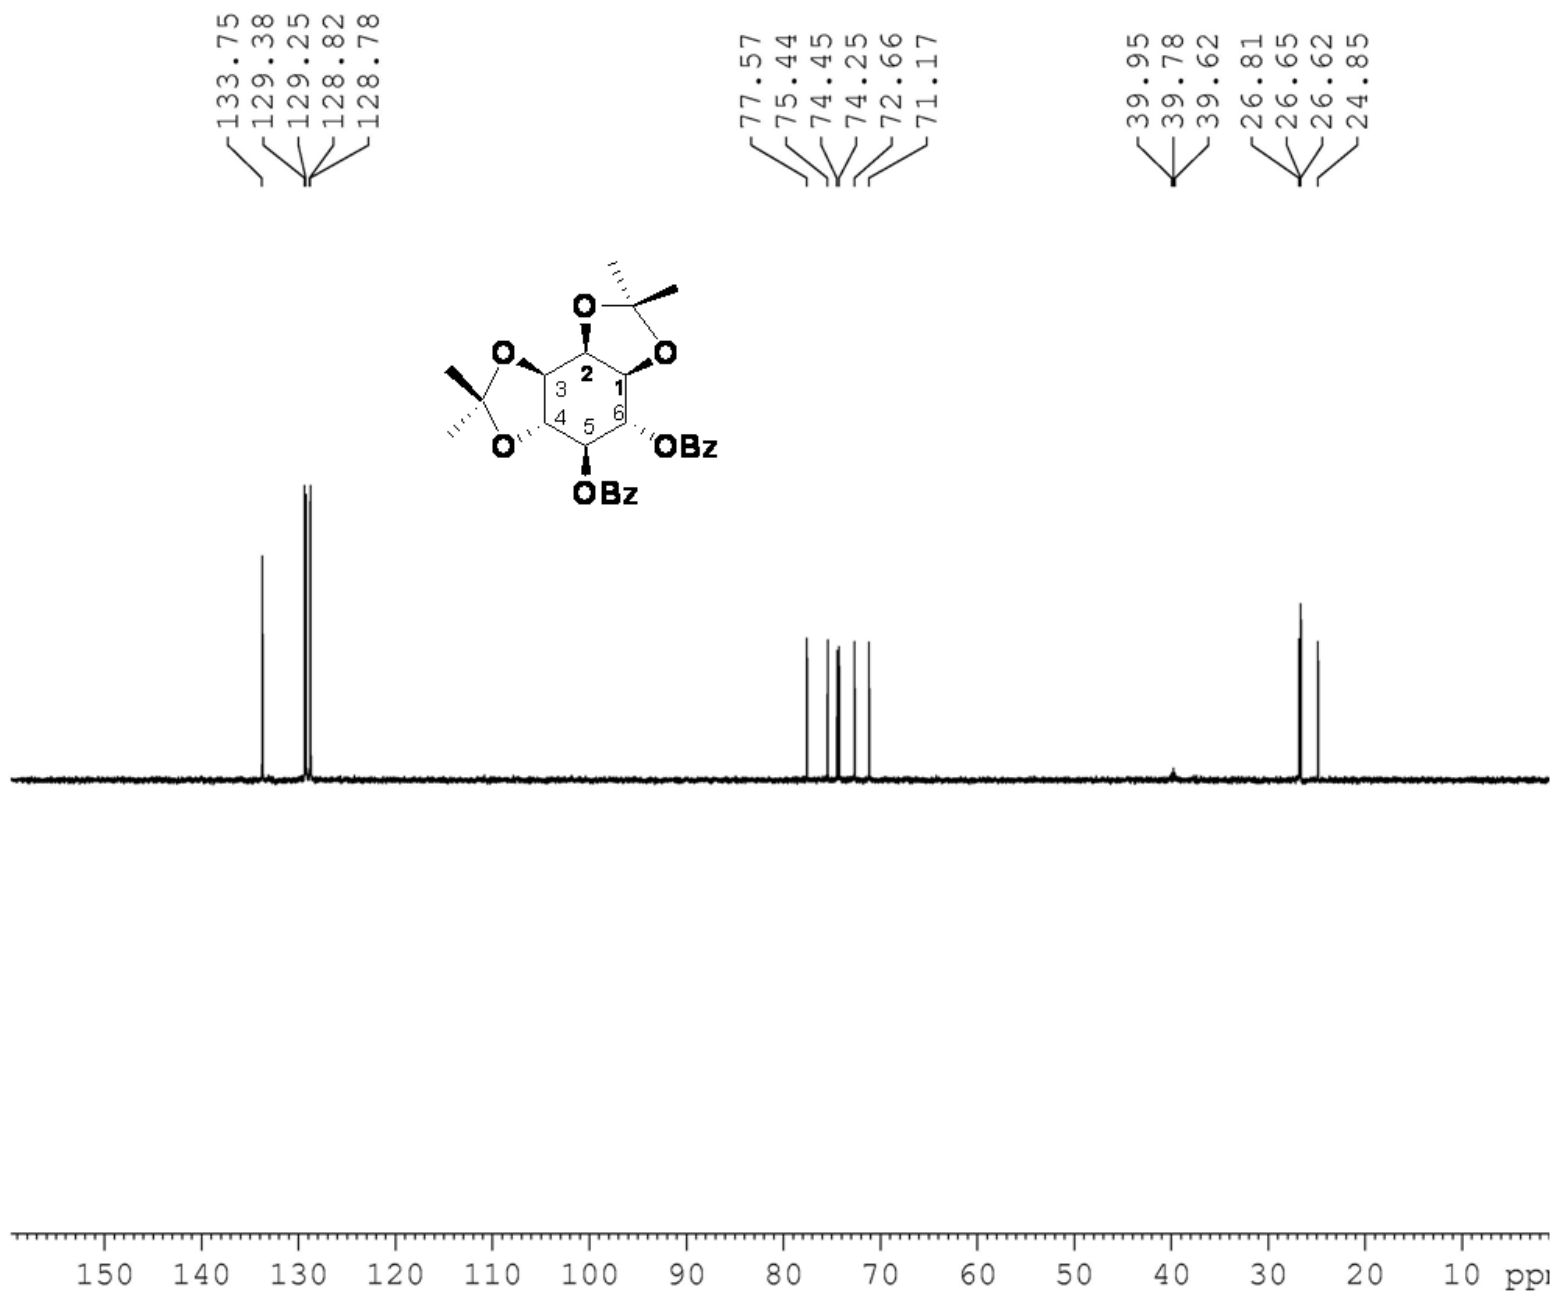

## Supplementary Information

### HMBC of 15 in DMSO-d<sub>6</sub>

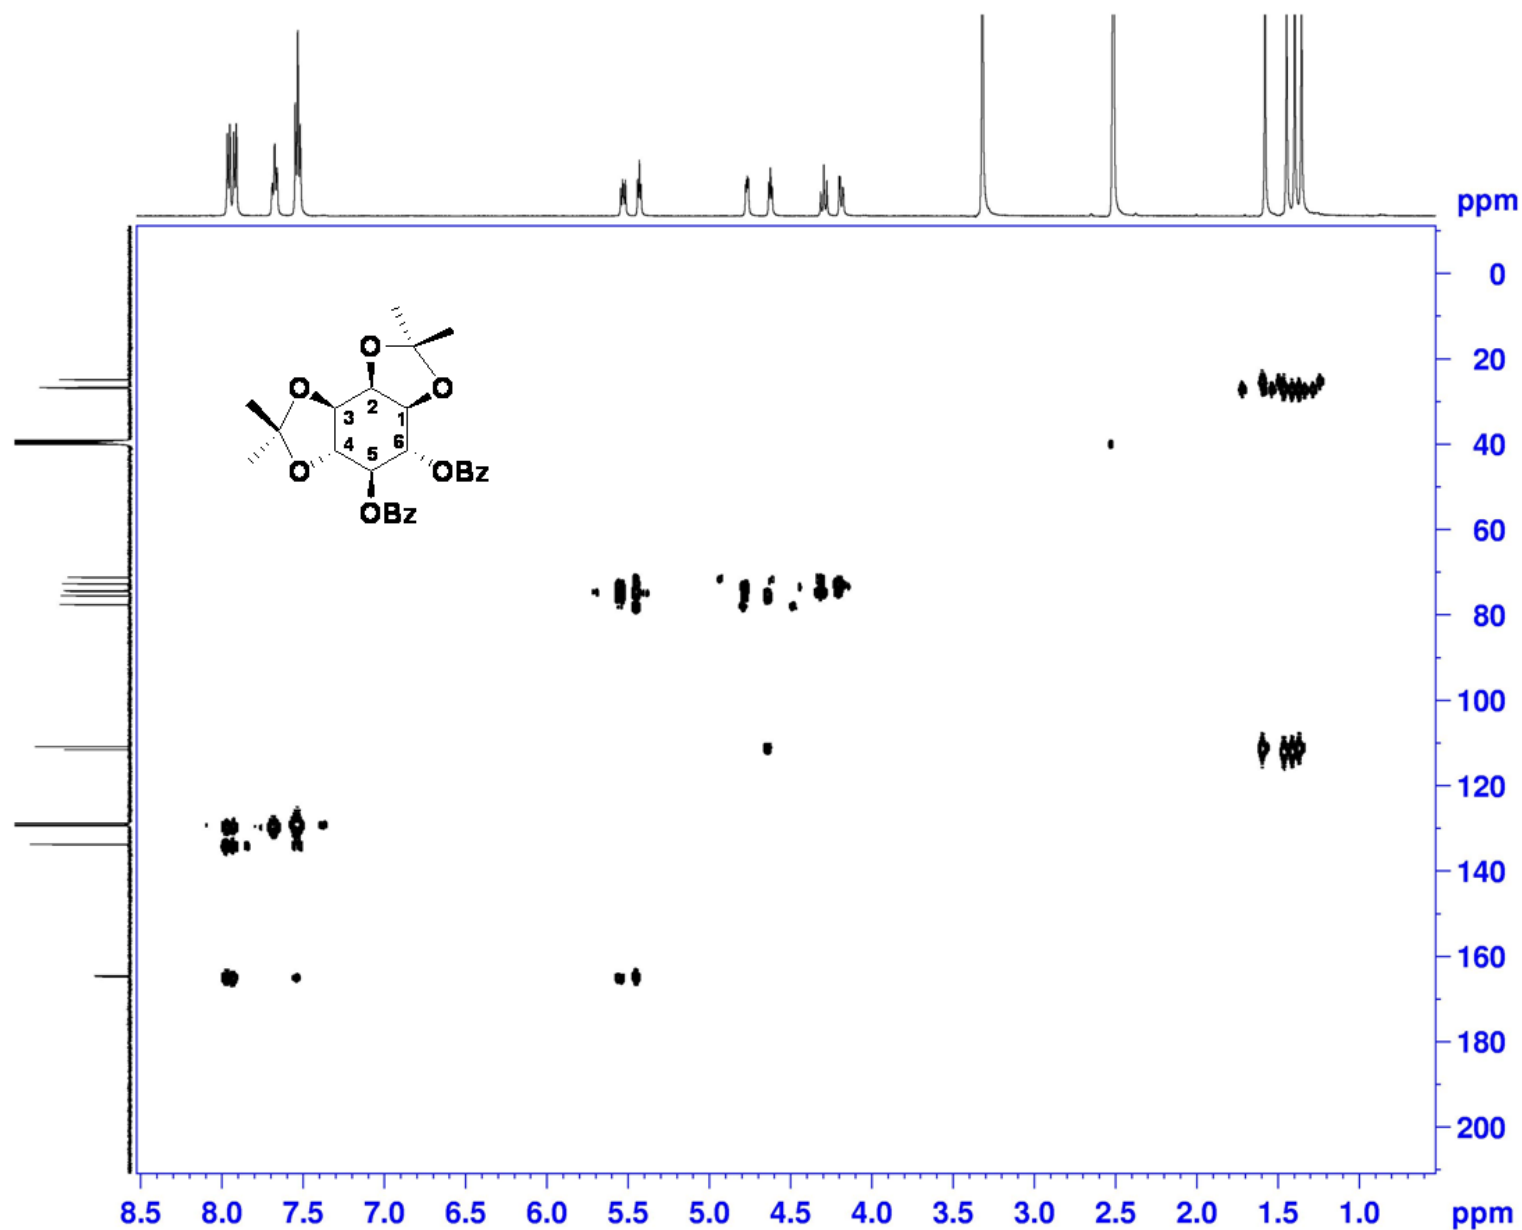

## Supplementary Information

### HMBC of 15 in DMSO-d<sub>6</sub> (zoom)

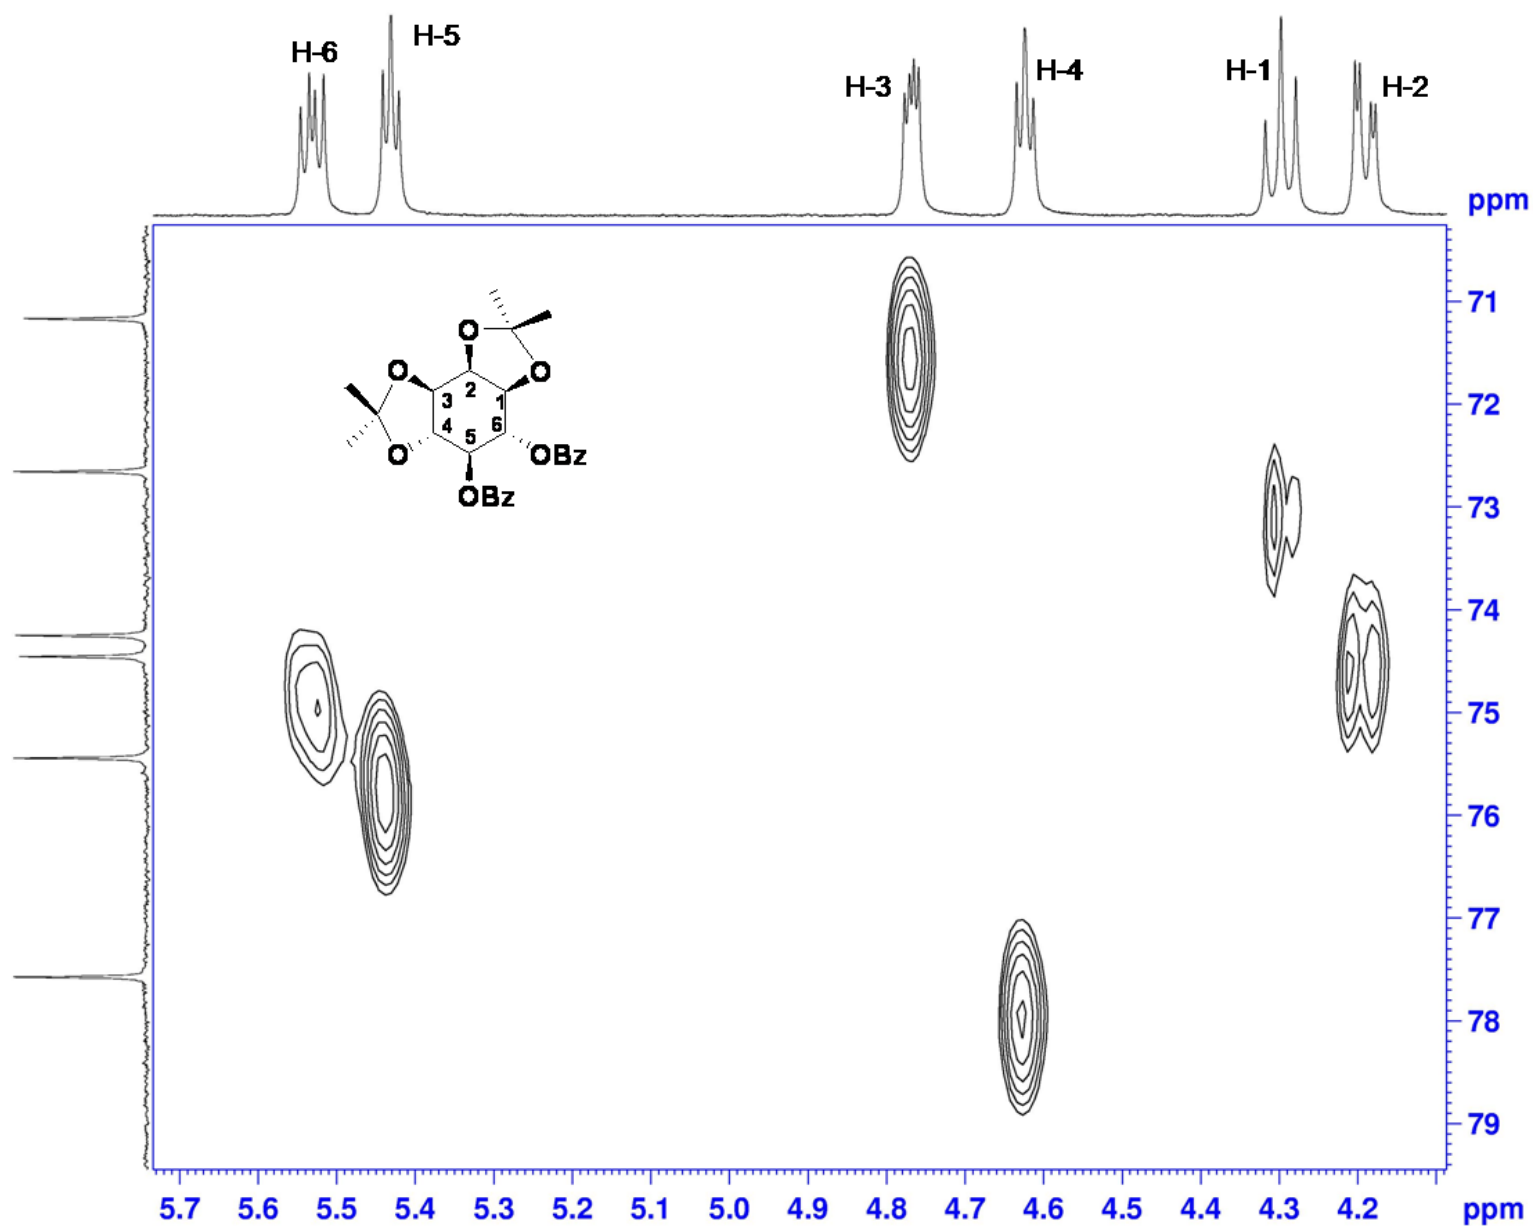

# Supplementary Information

## HMBC of 15 in DMSO-d<sub>6</sub> (zoom)

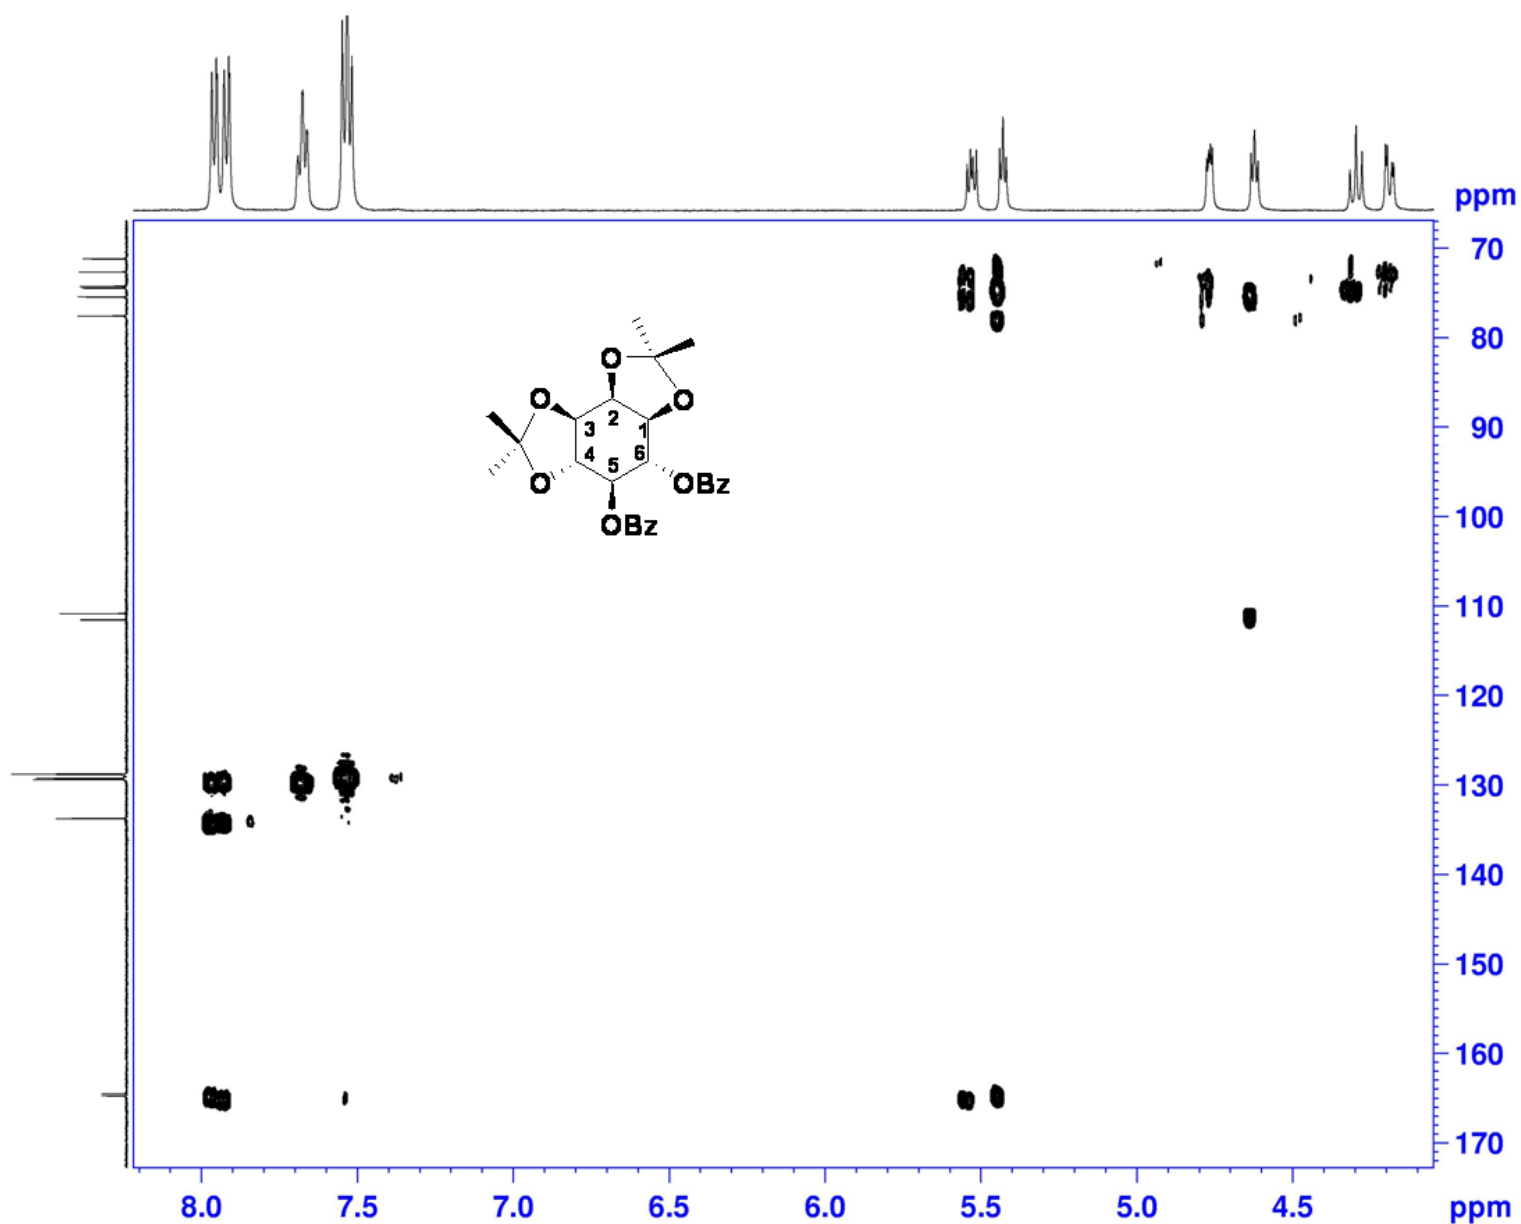



## Supplementary Information

### HMQC of 15 in DMSO-d<sub>6</sub>

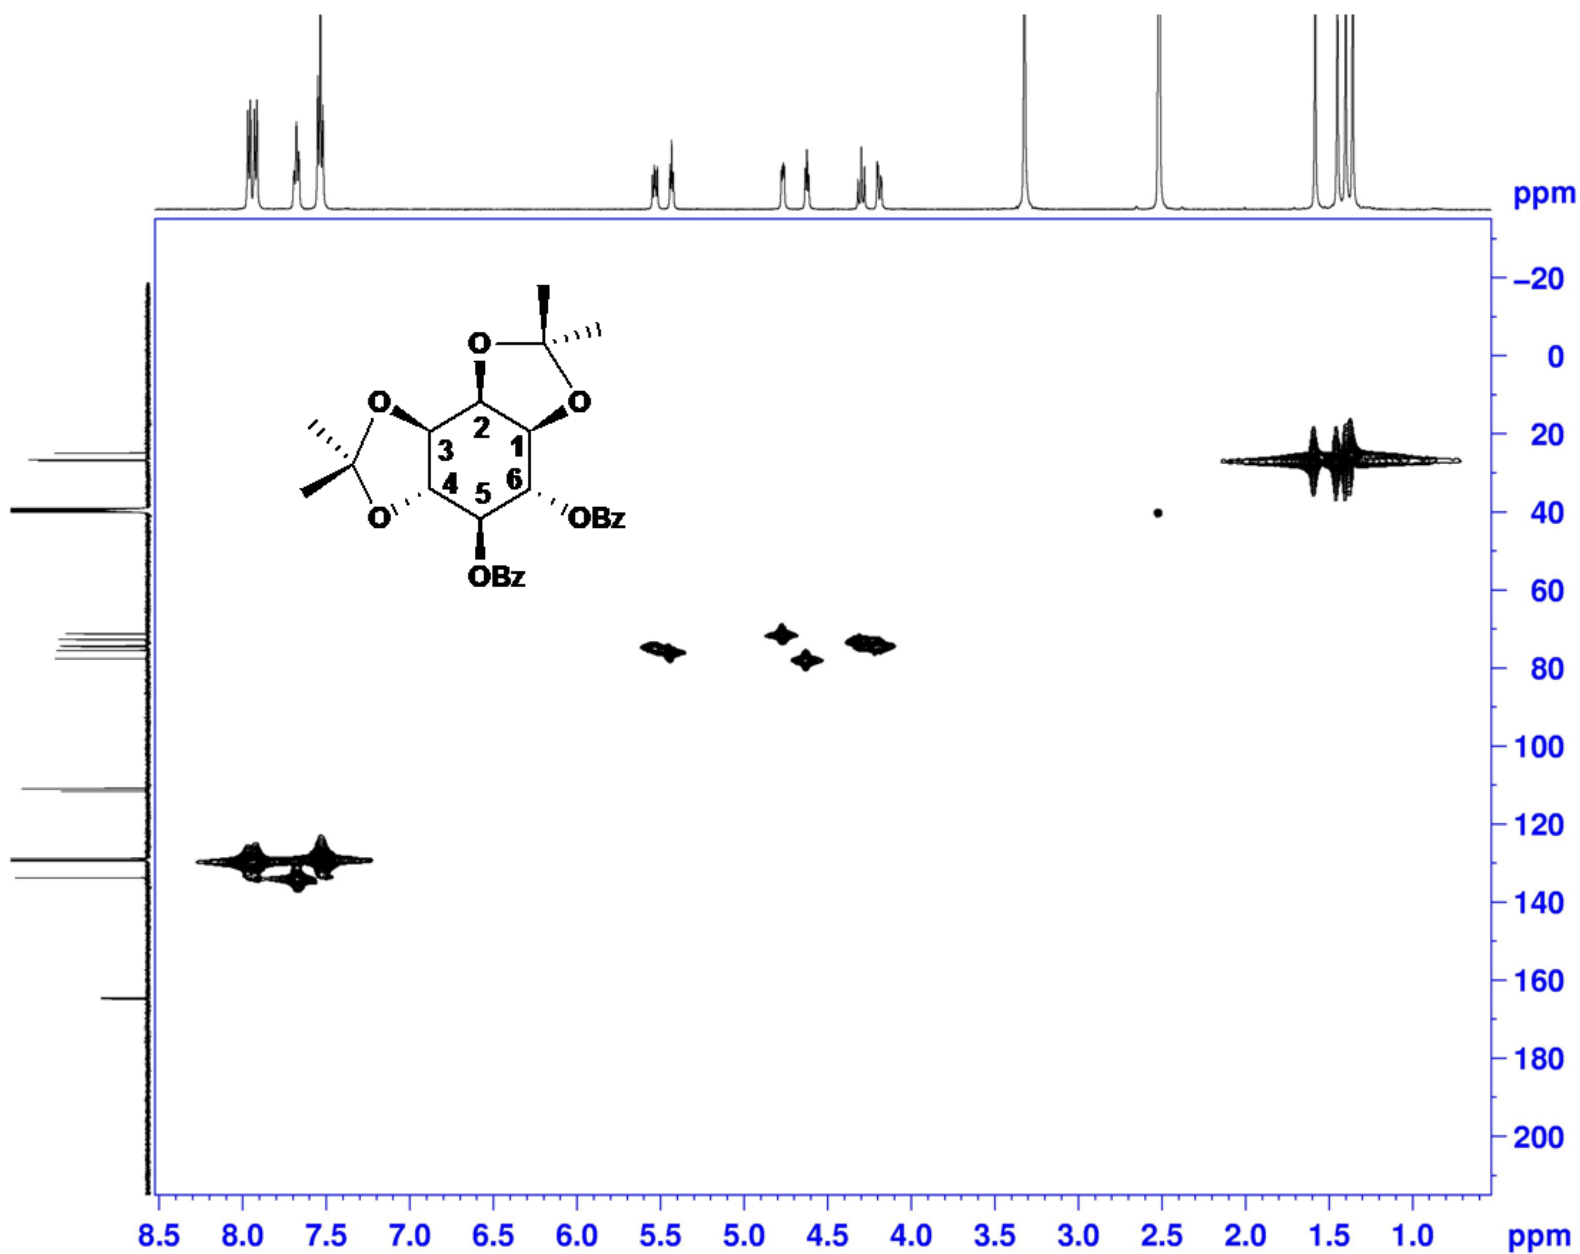

## Supplementary Information

### HMQC of 15 in DMSO-d<sub>6</sub> (zoom)

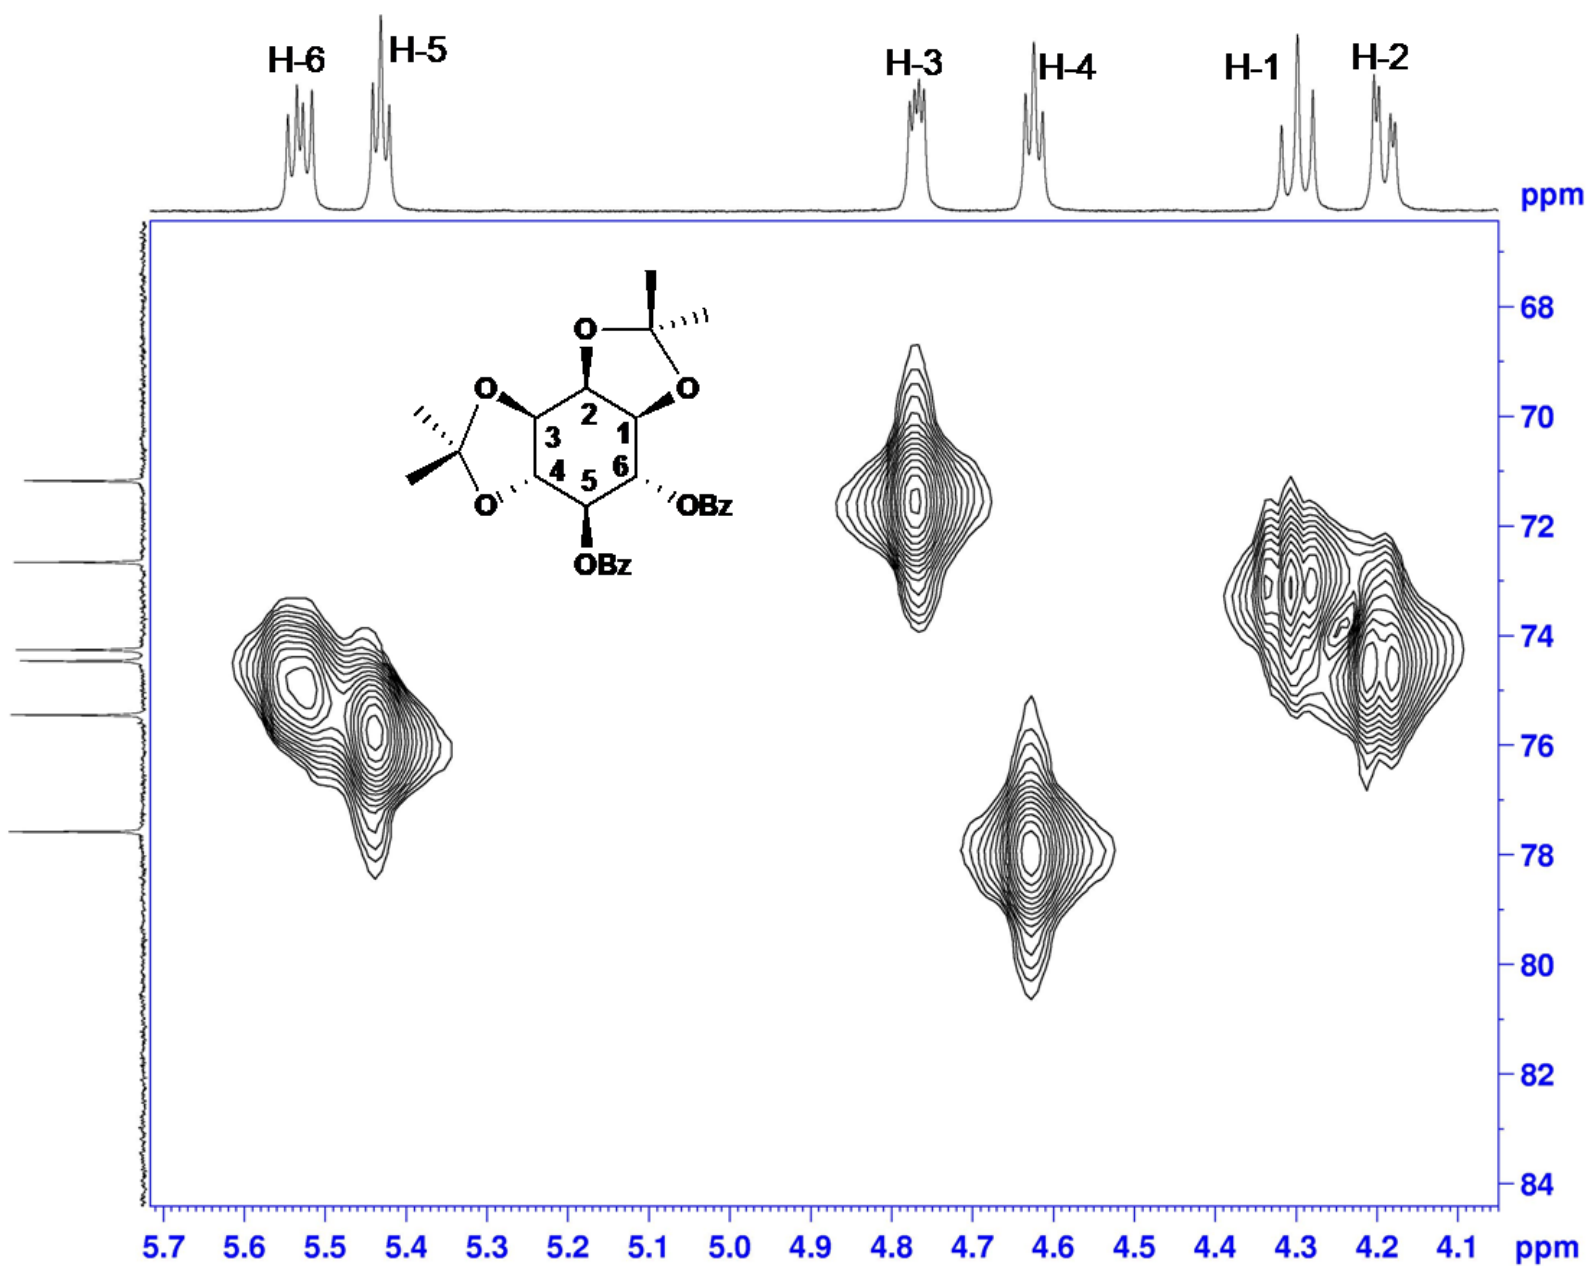

Supplement: c3ra40506k.pdf [file c3ra40506k.pdf]
